# Supplementary material
Source: publisher figshare collection journal article supplement (https://plos.figshare.com/articles/dataset/_/12060873)
Supplement: Supplementary file 1 [file 1]

Archive with 2 entries (2 files):
- pntd.0008108.s001.pdf
- pntd.0008108.s002.pdf
